# Supplementary material
Source: HighWire-hosted journal article supplement (https://advances.sciencemag.org/content/suppl/2015/02/25/1.1.e1400121)
Supplement: 1400121_SM.pdf [file 1400121_SM.pdf]

## Supplementary Materials for **Distinct plasma immune signatures in ME/CFS are present early in the course of illness**

Mady Hornig,\* José G. Montoya, Nancy G. Klimas, Susan Levine, Donna Felsenstein, Lucinda Bateman, Daniel L. Peterson, C. Gunnar Gottschalk, Andrew F. Schultz, Xiaoyu Che, Meredith L. Eddy, Anthony L. Komaroff, W. Ian Lipkin

\*Corresponding author. E-mail: mh2092@cumc.columbia.edu

Published 27 February 2015, *Sci. Adv.* **1**, e1400121 (2015)  
DOI: 10.1126/sciadv.1400121

### **This PDF file includes:**

#### Materials and Methods

Table S1. Comparison of plasma immune analytes in ME/CFS subjects versus controls.

Table S2. Comparison of plasma immune analytes in ME/CFS subjects versus controls.

Table S3. Comparison of plasma immune markers in ME/CFS subjects versus controls.

Table S4. Comparison of plasma immune analytes in short-duration versus long-duration ME/CFS subjects versus controls.

Table S5. Comparison of plasma immune analytes in short-duration versus long-duration ME/CFS subjects versus controls.

Table S6. Comparison of plasma immune markers in short-duration versus long-duration ME/CFS versus controls.

Table S7. Spearman correlations of levels of plasma immune markers with duration of illness in ME/CFS.

Table S8. Feature selection data for logistic regression predicting short-duration versus longduration ME/CFS.

Reference (73)

## Supplementary Materials and Methods

*Dimensionality reduction methods.* Feature selection strategies select subsets of relevant features for use in regression model construction based on the assumption that the data contain many redundant or irrelevant features. Feature extraction transforms highly dimensional input data into a reduced, representative set of features by extracting as much relevant information as possible from the input data. We employed one of the most widely used feature selection techniques, LASSO (least absolute shrinkage and selection operator) (69), and two feature extraction approaches, principal component analysis (PCA) and the partial least square (PLS) method.

LASSO regularizes the least squares by applying the constraint that the L1 norm of the parameter vector is no greater than a given value, whereby increasing the penalty will cause more and more of the parameters to be driven to absolute zero. To avoid overfitting, we selected variables that had non-zero coefficients when the cross-validation deviance reached the minimum plus one standard error of the mean (SEM). Our feature extraction approach began with the most popular orthogonal transformation procedure, PCA, wherein the PC of the original predictors are used as independent variables of the logistic regression model (73). A stepwise selection scheme was used to choose the optimal set of PCs wherein one PC was entered or excluded at each step to achieve the greatest improvement of model performance. Two separate criteria were used to evaluate the improvement in model performance: (1) conditional likelihood-ratio test and (2) cross-validation error rate. Upon arriving at the optimal set of PCs for the logistic regression model, the parameter vector and variance-covariance matrix were used to calculate the odds ratios (OR) and  $p$  values of all the original predictor variables, because all the PCs are certain linear combinations of them. If one predictor variable was significant ( $p < 0.05$ ) for both model improvement criteria, that predictor variable was considered a potential candidate for the final logistic regression model.

Because PCA is an unsupervised dimension reduction technique in which no importance is assigned to how each predictive variable relates to the dependent variable, we conducted an additional feature extraction method, PLS, that simultaneously incorporates the response variable into the procedure. Similar methods were then pursued, using PLS latent variables instead of PCs. The same two-model improvement strategy were applied here, wherein a potential candidate for the final logistic regression model independent variable was chosen if it was significant for both criteria.

For the final logistic regression model, a cytokine variable was entered either if it was selected by LASSO or if it was a potential candidate via both the PCA and PLS feature extraction methods. The ORs, their 95% confidence intervals (CIs) and  $p$  values of the selected cytokines were calculated accordingly.

## Supplementary Tables

**Table S1. Comparison of plasma immune analytes in ME/CFS subjects vs. controls.\***

| Analyte               | <i>p</i> value |
|-----------------------|----------------|
| IL1ra                 | 0.9068         |
| IL1 $\alpha$          | 0.5751         |
| IL1 $\beta$           | 0.2609         |
| IL2                   | 0.4518         |
| IL4                   | 0.3296         |
| IL5                   | 0.2423         |
| IL6                   | <b>0.0401</b>  |
| IL7                   | 0.7758         |
| CXCL8 (IL8)           | <b>0.0437</b>  |
| IL10                  | <b>0.0241</b>  |
| IL12p40               | 0.0803         |
| IL12p70               | 0.3737         |
| IL13                  | 0.5806         |
| IL15                  | 0.7576         |
| IL17A                 | <b>0.0043</b>  |
| IL17F                 | 0.1411         |
| IFN $\alpha$ 2        | 0.1906         |
| IFN $\beta$           | 0.7508         |
| IFN $\gamma$          | 0.1631         |
| TNF $\alpha$          | 0.5123         |
| TNF $\beta$           | <b>0.0028</b>  |
| CD40L                 | 0.1389         |
| sFasL                 | <b>0.0129</b>  |
| TRAIL (TNFSF10)       | 0.0950         |
| CCL2 (MCP1)           | 0.4500         |
| CCL3 (MIP1 $\alpha$ ) | 0.0524         |
| CCL4 (MIP1 $\beta$ )  | 0.9308         |
| CCL5 (RANTES)         | 0.7691         |
| CCL7 (MCP3)           | 0.9036         |
| CCL11 (eotaxin)       | 0.0858         |
| CXCL1 (GRO $\alpha$ ) | 0.6067         |
| CXCL5 (ENA78)         | 0.1643         |
| CXCL9 (MIG)           | 0.0863         |
| CXCL10 (IP10)         | <b>0.0444</b>  |
| TGF $\alpha$          | 0.1189         |
| TGF $\beta$           | 0.0694         |
| SCF (SF)              | 0.2187         |
| CSF1 (MCSF)           | <b>0.0235</b>  |
| CSF2 (GMCSF)          | 0.3184         |
| CSF3 (GCSF)           | 0.5793         |
| PDGFBB                | 0.9647         |
| $\beta$ NGF           | 0.1838         |
| FGFb                  | 0.9093         |
| HGF                   | 0.6292         |
| VEGFA                 | 0.9068         |
| LIF                   | 0.1466         |
| Resistin              | 0.1866         |
| Leptin                | <b>0.0301</b>  |
| Serpin E1 (PAI1)      | 0.0909         |
| sICAM1 (CD54)         | 0.3000         |
| VCAM1 (CD106)         | 0.7695         |

\* One-way ANOVA/GLM with independent variable of diagnosis (ME/CFS vs. controls)

**Table S2. Comparison of plasma immune analytes in ME/CFS subjects vs. controls.\***

| Analyte               | Diagnosis      | Sex               | Diagnosis<br>x Sex | Age               |
|-----------------------|----------------|-------------------|--------------------|-------------------|
|                       | <i>p</i> value | <i>p</i> value    | <i>p</i> value     | <i>p</i> value    |
| IL1ra                 | 0.9175         | 0.6933            | 0.6678             | 0.0558            |
| IL1 $\alpha$          | 0.9413         | 0.7373            | 0.3884             | 0.0829            |
| IL1 $\beta$           | 0.5874         | 0.9190            | 0.3640             | 0.1601            |
| IL2                   | 0.7543         | 0.0838            | 0.4941             | 0.1804            |
| IL4                   | 0.7944         | 0.9429            | 0.2223             | <b>0.0158</b>     |
| IL5                   | 0.3641         | 0.0727            | 0.8380             | 0.4267            |
| IL6                   | <b>0.0483</b>  | 0.6017            | 0.7052             | <b>0.0428</b>     |
| IL7                   | 0.7033         | 0.7754            | 0.1971             | 0.2505            |
| CXCL8 (IL8)           | 0.0947         | 0.1898            | 0.8144             | <b>0.0047</b>     |
| IL10                  | 0.1106         | 0.6836            | 0.4414             | 0.2619            |
| IL12p40               | 0.2721         | 0.9597            | 0.3602             | <b>0.0002</b>     |
| IL12p70               | 0.5700         | 0.0663            | 0.6891             | 0.9641            |
| IL13                  | 0.3478         | 0.9500            | 0.3508             | <b>0.0321</b>     |
| IL15                  | 0.9063         | 0.4405            | 0.4339             | 0.4828            |
| IL17A                 | <b>0.0203</b>  | 0.9748            | 0.7014             | <b>0.0034</b>     |
| IL17F                 | 0.4386         | <b>0.0093</b>     | 0.3079             | 0.8692            |
| IFN $\alpha$ 2        | 0.2912         | 0.5468            | 0.8652             | 0.1741            |
| IFN $\beta$           | 0.9446         | 0.2998            | 0.4873             | 0.0504            |
| IFN $\gamma$          | 0.3834         | 0.1225            | 0.4900             | 0.2584            |
| TNF $\alpha$          | 0.7592         | 0.6926            | 0.5889             | <b>0.0448</b>     |
| TNF $\beta$           | <b>0.0073</b>  | 0.9654            | 0.9248             | <b>0.0001</b>     |
| CD40L                 | 0.3436         | 0.1087            | 0.4513             | <b>0.0394</b>     |
| sFasL                 | <b>0.0385</b>  | 0.2258            | 0.7717             | <b>0.0001</b>     |
| TRAIL (TNFSF10)       | 0.3209         | 0.8575            | 0.3306             | <b>0.0032</b>     |
| CCL2 (MCP1)           | 0.8703         | 0.2498            | 0.0939             | 0.4618            |
| CCL3 (MIP1 $\alpha$ ) | 0.1641         | 0.2522            | 0.5142             | 0.1733            |
| CCL4 (MIP1 $\beta$ )  | 0.6983         | <b>0.0007</b>     | 0.4813             | 0.3767            |
| CCL5 (RANTES)         | 0.5778         | 0.5815            | 0.5429             | <b>0.0014</b>     |
| CCL7 (MCP3)           | 0.8130         | 0.6848            | 0.4864             | 0.1881            |
| CCL11 (eotaxin)       | 0.1167         | <b>0.0121</b>     | 0.8770             | <b>0.0008</b>     |
| CXCL1 (GRO $\alpha$ ) | 0.3414         | 0.4070            | 0.3093             | 0.3734            |
| CXCL5 (ENA78)         | 0.4476         | <b>&lt;0.0001</b> | 0.3531             | <b>0.0210</b>     |
| CXCL9 (MIG)           | 0.2302         | 0.5377            | 0.5458             | 0.5985            |
| CXCL10 (IP10)         | 0.1505         | 0.4965            | 0.5011             | 0.1518            |
| TGF $\alpha$          | 0.1938         | 0.2441            | 0.9014             | <b>0.0023</b>     |
| TGF $\beta$           | 0.2131         | 0.0712            | 0.4980             | 0.3418            |
| SCF (SF)              | 0.2181         | 0.7787            | 0.7416             | 0.1228            |
| CSF1 (MCSF)           | 0.0671         | 0.4191            | 0.7182             | <b>0.0002</b>     |
| CSF2 (GMCSF)          | 0.2545         | <b>&lt;0.0001</b> | 0.6672             | 0.1394            |
| CSF3 (GCSF)           | 0.7341         | 0.3920            | 0.7782             | 0.0795            |
| PDGFBB                | 0.7005         | 0.0844            | 0.4040             | <b>&lt;0.0001</b> |
| $\beta$ NGF           | 0.3029         | 0.5960            | 0.7809             | 0.4046            |
| FGFb                  | 0.5949         | 0.8500            | 0.3757             | 0.5767            |
| HGF                   | 0.9309         | <b>0.0007</b>     | 0.2640             | 0.1341            |
| VEGFA                 | 0.7822         | 0.4449            | 0.7310             | 0.4215            |
| LIF                   | 0.4132         | 0.0569            | 0.3673             | 0.4916            |
| Resistin              | 0.1509         | 0.4838            | 0.5869             | <b>&lt;0.0001</b> |
| Leptin                | <b>0.0195</b>  | <b>&lt;0.0001</b> | 0.6649             | 0.8029            |
| Serpin E1 (PAI1)      | 0.2248         | 0.4853            | 0.5865             | <b>0.0308</b>     |
| sICAM1 (CD54)         | 0.3357         | <b>0.0131</b>     | 0.9554             | <b>0.0057</b>     |
| VCAM1 (CD106)         | 0.7551         | 0.2373            | 0.9268             | <b>0.0001</b>     |

\* Two-way ANOVA/GLM with independent variables of diagnosis (ME/CFS vs. controls) and sex with age as a continuous covariate

**Table S3. Comparison of plasma immune markers in ME/CFS subjects vs. controls.**

| Analyte               | ME/CFS<br>(n=298) | Control<br>(n=348) | ME/CFS<br>vs. Control |
|-----------------------|-------------------|--------------------|-----------------------|
|                       | mean (SEM)        | mean (SEM)         | <i>p</i> value        |
| IL1ra                 | 39.6 (1.3)        | 40.5 (1.8)         | 0.9068                |
| IL1 $\alpha$          | 7.2 (0.2)         | 7.4 (0.2)          | 0.5751                |
| IL1 $\beta$           | 4.5 (0.1)         | 4.7 (0.1)          | 0.2609                |
| IL2                   | 4.0 (0.1)         | 4.1 (0.1)          |                       |
| IL4                   | 48.7 (0.8)        | 49.7 (0.7)         | 0.3296                |
| IL5                   | 30.0 (0.7)        | 31.1 (0.8)         |                       |
| IL6                   | 10.2 (0.4)        | 10.9 (0.3)         | 0.0401                |
| IL7                   | 15.3 (0.3)        | 15.4 (0.3)         |                       |
| CXCL8 (IL8)           | 3.4 (0.2)         | 4.0 (0.2)          | 0.0437                |
| IL10                  | 6.8 (0.2)         | 7.2 (0.2)          | 0.0241                |
| IL12p40               | 5.3 (0.1)         | 5.6 (0.1)          | 0.0803                |
| IL12p70               | 13.7 (0.4)        | 14.0 (0.3)         |                       |
| IL13                  | 9.9 (0.2)         | 9.8 (0.2)          | 0.5806                |
| IL15                  | 40.6 (1.4)        | 40.6 (1.1)         |                       |
| IL17A                 | 18.3 (0.6)        | 20.6 (0.6)         | 0.0043                |
| IL17F                 | 1.0 (0.1)         | 1.6 (0.6)          |                       |
| IFN $\alpha$ 2        | 26.1 (1.2)        | 27.2 (1.0)         | 0.1906                |
| IFN $\beta$           | 109.7 (13.6)      | 113.2 (10.7)       |                       |
| IFN $\gamma$          | 1.1 (0.0)         | 1.2 (0.0)          | 0.1631                |
| TNF $\alpha$          | 8.4 (0.3)         | 8.7 (0.4)          | 0.5123                |
| TNF $\beta$           | 2.4 (0.2)         | 3.3 (0.2)          | 0.0028                |
| CD40L                 | 109.6 (5.3)       | 100.6 (5.3)        | 0.1389                |
| sFasL                 | 10.2 (0.3)        | 11.4 (0.3)         | 0.0129                |
| TRAIL (TNFSF10)       | 51.9 (7.3)        | 48.9 (1.6)         | 0.0950                |
| CCL2 (MCP1)           | 31.2 (0.5)        | 31.6 (0.5)         | 0.4500                |
| CCL3 (MIP1 $\alpha$ ) | 11.2 (0.6)        | 12.4 (0.7)         | 0.0524                |
| CCL4 (MIP1 $\beta$ )  | 267.6 (30.0)      | 241.3 (7.7)        |                       |
| CCL5 (RANTES)         | 74.6 (1.6)        | 79.5 (4.8)         |                       |
| CCL7 (MCP3)           | 149.3 (2.7)       | 149.7 (2.4)        |                       |
| CCL11 (eotaxin)       | 31.0 (0.8)        | 28.7 (0.6)         |                       |
| CXCL1 (GRO $\alpha$ ) | 13.2 (0.3)        | 13.2 (0.3)         |                       |
| CXCL5 (ENA78)         | 116.5 (4.4)       | 126.0 (5.2)        |                       |
| CXCL9 (MIG)           | 74.4 (9.4)        | 74.8 (3.8)         | 0.0863                |
| CXCL10 (IP10)         | 40.5 (0.8)        | 43.5 (1.2)         | 0.0444                |
| TGF $\alpha$          | 2.6 (0.1)         | 2.8 (0.1)          | 0.1189                |
| TGF $\beta$           | 36.3 (1.1)        | 38.8 (1.1)         | 0.0694                |
| SCF (SF)              | 10.8 (0.2)        | 11.1 (0.2)         | 0.2187                |
| CSF1 (MCSF)           | 7.1 (0.3)         | 7.9 (0.3)          | 0.0235                |
| CSF2 (GMCSF)          | 38.2 (1.4)        | 35.7 (1.1)         |                       |
| CSF3 (GCSF)           | 25.3 (0.5)        | 25.8 (0.5)         |                       |
| PDGFBB                | 170.7 (10.6)      | 158.1 (8.8)        | 0.9647                |
| $\beta$ NGF           | 27.5 (0.7)        | 26.3 (0.5)         |                       |
| FGFb                  | 11.0 (0.2)        | 11.0 (0.2)         |                       |
| HGF                   | 15.2 (0.3)        | 15.6 (0.4)         |                       |
| VEGFA                 | 32.2 (1.0)        | 31.6 (0.6)         |                       |
| LIF                   | 3.8 (0.1)         | 4.0 (0.1)          |                       |
| Resistin              | 280.7 (8.2)       | 290.0 (6.5)        | 0.1866                |
| Leptin                | 1506.4 (76.4)     | 1398.4 (96.3)      |                       |
| Serpin E1 (PAI1)      | 556.4 (11.8)      | 555.5 (21.2)       |                       |
| sICAM1 (CD54)         | 1932.7 (104.2)    | 2078.3 (110.5)     | 0.3000                |
| VCAM1 (CD106)         | 269.1 (6.3)       | 281.0 (12.0)       | 0.7695                |

\* *p* value included for analytes meeting GLM criteria; green cells represent upregulated analytes and red cells represent downregulated analytes (2-group comparisons)

+ t-test with independent variables of diagnosis (ME/CFS vs. controls)

**Table S4. Comparison of plasma immune analytes in short vs. long duration ME/CFS subjects vs. controls.\***

| Analyte               | <i>p</i> value    |
|-----------------------|-------------------|
| IL1ra                 | <b>0.0104</b>     |
| IL1 $\alpha$          | <b>0.0067</b>     |
| IL1 $\beta$           | <b>0.0052</b>     |
| IL2                   | 0.7353            |
| IL4                   | <b>0.0001</b>     |
| IL5                   | 0.3836            |
| IL6                   | <b>0.0030</b>     |
| IL7                   | 0.6648            |
| CXCL8 (IL8)           | <b>&lt;0.0001</b> |
| IL10                  | <b>0.0001</b>     |
| IL12p40               | <b>&lt;0.0001</b> |
| IL12p70               | 0.2011            |
| IL13                  | <b>0.0458</b>     |
| IL15                  | 0.7660            |
| IL17A                 | <b>&lt;0.0001</b> |
| IL17F                 | 0.1032            |
| IFN $\alpha$ 2        | <b>0.0108</b>     |
| IFN $\beta$           | 0.1456            |
| IFN $\gamma$          | <b>0.0073</b>     |
| TNF $\alpha$          | <b>0.0094</b>     |
| TNF $\beta$           | <b>&lt;0.0001</b> |
| CD40L                 | <b>&lt;0.0001</b> |
| sFasL                 | <b>&lt;0.0001</b> |
| TRAIL (TNFSF10)       | <b>&lt;0.0001</b> |
| CCL2 (MCP1)           | <b>0.0059</b>     |
| CCL3 (MIP1 $\alpha$ ) | <b>0.0007</b>     |
| CCL4 (MIP1 $\beta$ )  | 0.6579            |
| CCL5 (RANTES)         | 0.0615            |
| CCL7 (MCP3)           | 0.4299            |
| CCL11 (eotaxin)       | 0.0557            |
| CXCL1 (GRO $\alpha$ ) | 0.6696            |
| CXCL5 (ENA78)         | 0.2779            |
| CXCL9 (MIG)           | <b>0.0011</b>     |
| CXCL10 (IP10)         | <b>0.0015</b>     |
| TGF $\alpha$          | <b>0.0031</b>     |
| TGF $\beta$           | <b>0.0332</b>     |
| SCF (SF)              | <b>0.0006</b>     |
| CSF1 (MCSF)           | <b>&lt;0.0001</b> |
| CSF2 (GMCSF)          | 0.2917            |
| CSF3 (GCSF)           | 0.1037            |
| PDGFBB                | <b>0.0003</b>     |
| $\beta$ NGF           | 0.3567            |
| FGFb                  | 0.6892            |
| HGF                   | 0.0837            |
| VEGFA                 | 0.9907            |
| LIF                   | 0.3236            |
| Resistin              | <b>&lt;0.0001</b> |
| Leptin                | 0.0740            |
| Serpin E1 (PAI1)      | 0.1738            |
| sICAM1 (CD54)         | <b>0.0238</b>     |
| VCAM1 (CD106)         | 0.0612            |

\* One-way ANOVA/GLM with independent variable of diagnosis (short vs. long duration ME/CFS vs. controls)

**Table S5. Comparison of plasma immune analytes in short vs. long duration ME/CFS subjects vs. controls.\***

| Analyte               | Diagnosis      | Sex               | Diagnosis<br>x Sex | Age               |
|-----------------------|----------------|-------------------|--------------------|-------------------|
|                       | <i>p</i> value | <i>p</i> value    | <i>p</i> value     | <i>p</i> value    |
| IL1ra                 | 0.1913         | 0.8262            | 0.5094             | 0.1724            |
| IL1 $\alpha$          | 0.1270         | 0.9731            | 0.4614             | 0.2485            |
| IL1 $\beta$           | 0.0665         | 0.9108            | 0.6050             | 0.4164            |
| IL2                   | 0.9371         | 0.1740            | 0.7216             | 0.1934            |
| IL4                   | <b>0.0096</b>  | 0.9179            | 0.4317             | 0.1021            |
| IL5                   | 0.6365         | 0.1219            | 0.8689             | 0.4990            |
| IL6                   | <b>0.0410</b>  | 0.2902            | 0.5550             | 0.1232            |
| IL7                   | 0.8881         | 0.8465            | 0.3836             | 0.3130            |
| CXCL8 (IL8)           | <b>0.0022</b>  | 0.4767            | 0.7934             | <b>0.0436</b>     |
| IL10                  | <b>0.0045</b>  | 0.8667            | 0.7166             | 0.6830            |
| IL12p40               | <b>0.0015</b>  | 0.9485            | 0.5104             | <b>0.0048</b>     |
| IL12p70               | 0.4531         | 0.1233            | 0.7969             | 0.7254            |
| IL13                  | 0.1482         | 0.8706            | 0.6381             | 0.0921            |
| IL15                  | 0.9653         | 0.5248            | 0.6670             | 0.5529            |
| IL17A                 | <b>0.0004</b>  | 0.8737            | 0.7787             | <b>0.0357</b>     |
| IL17F                 | 0.2767         | 0.1254            | 0.5854             | 0.8721            |
| IFN $\alpha$ 2        | 0.0837         | 0.5465            | 0.9030             | 0.4024            |
| IFN $\beta$           | 0.4496         | 0.4974            | 0.7663             | 0.1098            |
| IFN $\gamma$          | 0.0932         | 0.1994            | 0.6486             | 0.5555            |
| TNF $\alpha$          | 0.1720         | 0.5073            | 0.5716             | 0.1437            |
| TNF $\beta$           | <b>0.0010</b>  | 0.7754            | 0.8397             | <b>0.0017</b>     |
| CD40L                 | <b>0.0020</b>  | 0.1523            | 0.7395             | 0.2195            |
| sFasL                 | <b>0.0003</b>  | 0.4624            | 0.8347             | <b>0.0017</b>     |
| TRAIL (TNFSF10)       | <b>0.0073</b>  | 0.8671            | 0.5180             | <b>0.0307</b>     |
| CCL2 (MCP1)           | 0.1359         | 0.2304            | 0.0978             | 0.8835            |
| CCL3 (MIP1 $\alpha$ ) | <b>0.0240</b>  | 0.5497            | 0.6048             | 0.4676            |
| CCL4 (MIP1 $\beta$ )  | 0.8490         | 0.0538            | 0.3937             | 0.2894            |
| CCL5 (RANTES)         | 0.2083         | 0.6093            | 0.7843             | <b>0.0059</b>     |
| CCL7 (MCP3)           | 0.8198         | 0.6086            | 0.6324             | 0.2732            |
| CCL11 (eotaxin)       | 0.1746         | 0.0968            | 0.9480             | <b>0.0022</b>     |
| CXCL1 (GRO $\alpha$ ) | 0.6325         | 0.4512            | 0.4809             | 0.4363            |
| CXCL5 (ENA78)         | 0.4815         | <b>&lt;0.0001</b> | 0.3318             | <b>0.0335</b>     |
| CXCL9 (MIG)           | <b>0.0164</b>  | 0.6125            | 0.7497             | 0.8942            |
| CXCL10 (IP10)         | <b>0.0351</b>  | 0.7020            | 0.6823             | 0.3910            |
| TGF $\alpha$          | 0.0815         | 0.2421            | 0.8045             | <b>0.0117</b>     |
| TGF $\beta$           | 0.1380         | 0.3012            | 0.7846             | 0.5668            |
| SCF (SF)              | <b>0.0264</b>  | 0.3547            | 0.4948             | 0.3862            |
| CSF1 (MCSF)           | <b>0.0012</b>  | 0.9998            | 0.4268             | <b>0.0040</b>     |
| CSF2 (GMCSF)          | 0.2081         | <b>0.0001</b>     | 0.5438             | 0.2293            |
| CSF3 (GCSF)           | 0.3028         | 0.6094            | 0.9592             | 0.1739            |
| PDGFBB                | 0.0992         | 0.1167            | 0.4564             | <b>&lt;0.0001</b> |
| $\beta$ NGF           | 0.5627         | 0.6857            | 0.9579             | 0.4609            |
| FGFb                  | 0.7459         | 0.9677            | 0.6589             | 0.6919            |
| HGF                   | 0.3134         | <b>0.0109</b>     | 0.4923             | 0.2819            |
| VEGFA                 | 0.9082         | 0.4245            | 0.8237             | 0.4089            |
| LIF                   | 0.7007         | 0.1274            | 0.5585             | 0.4478            |
| Resistin              | <b>0.0093</b>  | 0.4317            | 0.8176             | <b>&lt;0.0001</b> |
| Leptin                | 0.0633         | <b>&lt;0.0001</b> | 0.1511             | 0.8545            |
| Serpin E1 (PAI1)      | 0.1604         | 0.9041            | 0.6489             | <b>0.0163</b>     |
| sICAM1 (CD54)         | 0.0951         | <b>0.0407</b>     | 0.9456             | <b>0.0228</b>     |
| VCAM1 (CD106)         | 0.2988         | 0.2958            | 0.9588             | <b>0.0004</b>     |

\* Two-way ANOVA/GLM with independent variables of diagnosis (short vs. long duration ME/CFS vs. controls) and sex with age as a continuous covariate



**Table S6. Comparison of plasma immune markers in short vs. long duration ME/CFS vs. controls.**

| Analyte          | Short duration ME/CFS (n=52) | Long duration ME/CFS (n=246) | Control (n=348) | Short vs. long duration ME/CFS | Short duration ME/CFS vs. Control | Long duration ME/CFS vs. Control |
|------------------|------------------------------|------------------------------|-----------------|--------------------------------|-----------------------------------|----------------------------------|
|                  | mean (SEM)                   | mean (SEM)                   | mean (SEM)      | p value* <sup>†</sup>          | p value* <sup>†</sup>             | p value* <sup>†</sup>            |
| IL1ra            | 45.2 (2.4)                   | 38.5 (1.4)                   | 40.5 (1.8)      | 0.0028                         | 0.0105                            | 0.2864                           |
| IL1α             | 8.4 (0.5)                    | 7.0 (0.2)                    | 7.4 (0.2)       | 0.0017                         | 0.0178                            | 0.1309                           |
| IL1β             | 5.1 (0.2)                    | 4.4 (0.1)                    | 4.7 (0.1)       | 0.0015                         | 0.0504                            | 0.0440                           |
| IL2              | 4.0 (0.3)                    | 4.0 (0.1)                    | 4.1 (0.1)       |                                |                                   |                                  |
| IL4              | 55.4 (1.7)                   | 47.3 (0.8)                   | 49.7 (0.7)      | <0.0001                        | 0.0028                            | 0.0257                           |
| IL5              | 30.9 (1.6)                   | 29.8 (0.8)                   | 31.1 (0.8)      |                                |                                   |                                  |
| IL6              | 12.1 (0.9)                   | 9.8 (0.5)                    | 10.9 (0.3)      | 0.0105                         | 0.1996                            | 0.0048                           |
| IL7              | 15.7 (0.7)                   | 15.3 (0.4)                   | 15.4 (0.3)      |                                |                                   |                                  |
| CXCL8 (IL8)      | 4.6 (0.3)                    | 3.1 (0.2)                    | 4.0 (0.2)       | <0.0001                        | 0.0112                            | 0.0011                           |
| IL10             | 7.9 (0.4)                    | 6.6 (0.2)                    | 7.2 (0.2)       | 0.0004                         | 0.0644                            | 0.0011                           |
| IL12p40          | 6.5 (0.3)                    | 5.0 (0.1)                    | 5.6 (0.1)       | <0.0001                        | 0.0009                            | 0.0012                           |
| IL12p70          | 14.8 (1.0)                   | 13.4 (0.4)                   | 14.0 (0.3)      |                                |                                   |                                  |
| IL13             | 10.9 (0.5)                   | 9.7 (0.2)                    | 9.8 (0.2)       | 0.0128                         | 0.0198                            | 0.8047                           |
| IL15             | 41.2 (2.6)                   | 40.5 (1.6)                   | 40.6 (1.1)      |                                |                                   |                                  |
| IL17A            | 23.8 (1.6)                   | 17.2 (0.6)                   | 20.6 (0.6)      | <0.0001                        | 0.0243                            | <0.0001                          |
| IL17F            | 0.9 (0.1)                    | 1.0 (0.1)                    | 1.6 (0.6)       |                                |                                   |                                  |
| IFNα2            | 33.1 (3.6)                   | 24.7 (1.2)                   | 27.2 (1.0)      | 0.0089                         | 0.1052                            | 0.0330                           |
| IFNβ             | 108.3 (11.5)                 | 110.0 (16.3)                 | 113.2 (10.7)    |                                |                                   |                                  |
| IFNγ             | 1.3 (0.1)                    | 1.1 (0.0)                    | 1.2 (0.0)       | 0.0040                         | 0.1077                            | 0.0262                           |
| TNFα             | 10.0 (0.7)                   | 8.0 (0.4)                    | 8.7 (0.4)       | 0.0029                         | 0.0261                            | 0.1192                           |
| TNFβ             | 4.0 (0.4)                    | 2.1 (0.2)                    | 3.3 (0.2)       | <0.0001                        | 0.0957                            | <0.0001                          |
| CD40L            | 72.8 (8.5)                   | 117.3 (6.1)                  | 100.6 (5.3)     | <0.0001                        | 0.0037                            | 0.0060                           |
| sFasL            | 13.7 (0.7)                   | 9.4 (0.4)                    | 11.4 (0.3)      | <0.0001                        | 0.0042                            | 0.0001                           |
| TRAIL (TNFSF10)  | 94.7 (41.0)                  | 42.8 (1.5)                   | 48.9 (1.6)      | <0.0001                        | 0.0079                            | 0.0027                           |
| CCL2 (MCP1)      | 34.6 (1.2)                   | 30.4 (0.6)                   | 31.6 (0.5)      | 0.0025                         | 0.0208                            | 0.0889                           |
| CCL3 (MIP1α)     | 13.2 (0.8)                   | 10.8 (0.7)                   | 12.4 (0.7)      | 0.0011                         | 0.0688                            | 0.0042                           |
| CCL4 (MIP1β)     | 246.9 (14.6)                 | 272.0 (36.2)                 | 241.3 (7.7)     |                                |                                   |                                  |
| CCL5 (RANTES)    | 83.1 (3.6)                   | 72.8 (1.8)                   | 79.5 (4.8)      |                                |                                   |                                  |
| CCL7 (MCP3)      | 157.1 (7.0)                  | 147.7 (2.9)                  | 149.7 (2.4)     |                                |                                   |                                  |
| CCL11 (eotaxin)  | 26.8 (1.1)                   | 31.9 (0.9)                   | 28.7 (0.6)      |                                |                                   |                                  |
| CXCL1 (GROα)     | 13.5 (0.6)                   | 13.2 (0.3)                   | 13.2 (0.3)      |                                |                                   |                                  |
| CXCL5 (ENA78)    | 113.1 (11.4)                 | 117.3 (4.8)                  | 126.0 (5.2)     |                                |                                   |                                  |
| CXCL9 (MIG)      | 127.9 (52.8)                 | 63.1 (2.2)                   | 74.8 (3.8)      | 0.0011                         | 0.0668                            | 0.0071                           |
| CXCL10 (IP10)    | 45.0 (1.7)                   | 39.5 (0.9)                   | 43.5 (1.2)      | 0.0023                         | 0.1435                            | 0.0046                           |
| TGFα             | 3.2 (0.2)                    | 2.5 (0.2)                    | 2.8 (0.1)       | 0.0036                         | 0.0712                            | 0.0153                           |
| TGFβ             | 40.4 (2.7)                   | 35.4 (1.3)                   | 38.8 (1.1)      | 0.0666                         | 0.5251                            | 0.0207                           |
| SCF (SF)         | 12.5 (0.6)                   | 10.5 (0.2)                   | 11.1 (0.2)      | 0.0008                         | 0.0110                            | 0.0185                           |
| CSF1 (MCSF)      | 10.2 (0.9)                   | 6.4 (0.3)                    | 7.9 (0.3)       | <0.0001                        | 0.0028                            | 0.0002                           |
| CSF2 (GMCSF)     | 33.1 (2.5)                   | 39.2 (1.6)                   | 35.7 (1.1)      |                                |                                   |                                  |
| CSF3 (GCSF)      | 27.6 (1.2)                   | 24.9 (0.6)                   | 25.8 (0.5)      |                                |                                   |                                  |
| PDGFBB           | 97.8 (13.9)                  | 186.1 (12.3)                 | 158.1 (8.8)     | <0.0001                        | 0.0004                            | 0.1789                           |
| βNGF             | 28.5 (3.0)                   | 27.3 (0.5)                   | 26.3 (0.5)      |                                |                                   |                                  |
| FGFb             | 11.4 (0.5)                   | 11.0 (0.2)                   | 11.0 (0.2)      |                                |                                   |                                  |
| HGF              | 16.7 (0.8)                   | 14.9 (0.4)                   | 15.6 (0.4)      |                                |                                   |                                  |
| VEGFA            | 31.5 (1.3)                   | 32.3 (1.2)                   | 31.6 (0.6)      |                                |                                   |                                  |
| LIF              | 3.9 (0.2)                    | 3.8 (0.1)                    | 4.0 (0.1)       |                                |                                   |                                  |
| Resistin         | 335.2 (13.0)                 | 269.2 (9.4)                  | 290.0 (6.5)     | <0.0001                        | 0.0024                            | 0.0087                           |
| Leptin           | 1600.6 (192.0)               | 1486.5 (83.3)                | 1398.4 (96.3)   |                                |                                   |                                  |
| Serpin E1 (PAI1) | 540.2 (31.9)                 | 559.9 (12.6)                 | 555.5 (21.2)    |                                |                                   |                                  |
| sICAM1 (CD54)    | 2560.0 (362.3)               | 1800.1 (98.7)                | 2078.3 (110.5)  | 0.0122                         | 0.1175                            | 0.0684                           |
| VCAM1 (CD106)    | 314.5 (17.3)                 | 259.6 (6.6)                  | 281.0 (12.0)    |                                |                                   |                                  |

\* p value included for analytes meeting GLM criteria; green cells represent upregulated analytes and red cells represent downregulated analytes (2-group comparisons)

<sup>†</sup> t-test with independent variable of diagnosis (short vs. long duration ME/CFS, short duration ME/CFS vs. controls, long duration ME/CFS vs. controls)

**Table S7. Spearman correlations of levels of plasma immune markers with duration of illness in ME/CFS.\***

| Analyte               | Correlation Coefficient | <i>p</i> value  |
|-----------------------|-------------------------|-----------------|
| IL1ra                 | <b>-0.183</b>           | <b>0.001539</b> |
| IL1 $\alpha$          | <b>-0.138</b>           | <b>0.016906</b> |
| IL1 $\beta$           | <b>-0.164</b>           | <b>0.004619</b> |
| IL2                   | 0.04                    | 0.488784        |
| IL4                   | <b>-0.232</b>           | <b>0.000051</b> |
| IL5                   | -0.018                  | 0.759259        |
| IL6                   | <b>-0.115</b>           | <b>0.046946</b> |
| IL7                   | -0.027                  | 0.641715        |
| CXCL8 (IL8)           | <b>-0.236</b>           | <b>0.000038</b> |
| IL10                  | <b>-0.188</b>           | <b>0.001127</b> |
| IL12p40               | <b>-0.286</b>           | <b>0.000001</b> |
| IL12p70               | -0.061                  | 0.297387        |
| IL13                  | <b>-0.133</b>           | <b>0.022093</b> |
| IL15                  | -0.015                  | 0.797466        |
| IL17A                 | <b>-0.217</b>           | <b>0.000155</b> |
| IL17F                 | -0.056                  | 0.333938        |
| IFN $\alpha$ 2        | -0.111                  | 0.054611        |
| IFN $\beta$           | -0.045                  | 0.435424        |
| IFN $\gamma$          | <b>-0.143</b>           | <b>0.013186</b> |
| TNF $\alpha$          | <b>-0.156</b>           | <b>0.006910</b> |
| TNF $\beta$           | <b>-0.276</b>           | <b>0.000001</b> |
| CD40L                 | <b>0.197</b>            | <b>0.000637</b> |
| sFasL                 | <b>-0.257</b>           | <b>0.000007</b> |
| TRAIL (TNFSF10)       | <b>-0.261</b>           | <b>0.000005</b> |
| CCL2 (MCP1)           | <b>-0.146</b>           | <b>0.011542</b> |
| CCL3 (MIP1 $\alpha$ ) | <b>-0.138</b>           | <b>0.016923</b> |
| CCL4 (MIP1 $\beta$ )  | -0.021                  | 0.721205        |
| CCL5 (RANTES)         | <b>-0.134</b>           | <b>0.021111</b> |
| CCL7 (MCP3)           | -0.047                  | 0.420360        |
| CCL11 (eotaxin)       | 0.096                   | 0.098306        |
| CXCL1 (GRO $\alpha$ ) | -0.068                  | 0.244968        |
| CXCL5 (ENA78)         | -0.011                  | 0.853600        |
| CXCL9 (MIG)           | <b>-0.135</b>           | <b>0.019609</b> |
| CXCL10 (IP10)         | <b>-0.123</b>           | <b>0.033956</b> |
| TGF $\alpha$          | <b>-0.173</b>           | <b>0.002768</b> |
| TGF $\beta$           | -0.085                  | 0.145443        |
| SCF (SF)              | <b>-0.202</b>           | <b>0.000439</b> |
| CSF1 (MCSF)           | <b>-0.261</b>           | <b>0.000005</b> |
| CSF2 (GMCSF)          | 0.102                   | 0.077525        |
| CSF3 (GCSF)           | -0.113                  | 0.051063        |
| PDGFBB                | <b>0.174</b>            | <b>0.002615</b> |
| $\beta$ NGF           | 0.035                   | 0.551497        |
| FGFb                  | -0.059                  | 0.313315        |
| HGF                   | <b>-0.119</b>           | <b>0.040546</b> |
| VEGFA                 | -0.019                  | 0.741025        |
| LIF                   | -0.027                  | 0.644775        |
| Resistin              | <b>-0.258</b>           | <b>0.000006</b> |
| Leptin                | -0.049                  | 0.399718        |
| Serpin E1 (PAI1)      | 0.006                   | 0.913159        |
| sICAM1 (CD54)         | <b>-0.196</b>           | <b>0.000659</b> |
| VCAM1 (CD106)         | <b>-0.184</b>           | <b>0.001421</b> |

\* green cells represent positive correlations with  $p < 0.05$ ; red cells represent inverse correlations with  $p < 0.05$

**Table S8. Feature selection data for logistic regression predicting short vs. long duration ME/CFS.**

| Variable              | PCA LR        |              | PCA CV LR     |              | PLS LR        |              | PLS CV LR     |              | LASSO               |
|-----------------------|---------------|--------------|---------------|--------------|---------------|--------------|---------------|--------------|---------------------|
|                       | OR            | p value      |                     |
| Age                   | <b>0.029</b>  | <b>0.000</b> | <b>0.041</b>  | <b>0.000</b> | <b>0.097</b>  | <b>0.009</b> | <b>0.074</b>  | <b>0.000</b> | -2.140082812        |
| Sex                   | 0.712         | 0.428        | 0.774         | 0.514        | 0.394         | 0.056        | 0.786         | 0.534        | 0                   |
| IL1ra                 | 0.826         | 0.541        | 0.364         | 0.345        | 3.268         | 0.399        | 1.514         | 0.565        | 0                   |
| IL1 $\alpha$          | 1.403         | 0.079        | 1.228         | 0.494        | <b>29.422</b> | <b>0.000</b> | 1.477         | 0.459        | 0                   |
| IL1 $\beta$           | <b>15.175</b> | <b>0.005</b> | 1.024         | 0.929        | <b>0.010</b>  | <b>0.000</b> | 0.272         | 0.492        | 0                   |
| IL2                   | <b>11.198</b> | <b>0.000</b> | 1.868         | 0.329        | <b>5.460</b>  | <b>0.001</b> | 0.612         | 0.623        | 0                   |
| IL4                   | 0.157         | 0.373        | 1.121         | 0.555        | 0.435         | 0.187        | 0.682         | 0.767        | 0                   |
| IL5                   | <b>0.000</b>  | <b>0.000</b> | 1.169         | 0.513        | <b>0.001</b>  | <b>0.000</b> | 1.247         | 0.889        | 0                   |
| IL6                   | 8.767         | 0.155        | 0.456         | 0.386        | <b>0.462</b>  | <b>0.002</b> | 0.715         | 0.894        | 0                   |
| IL7                   | 0.048         | 0.166        | 0.692         | 0.397        | <b>3.953</b>  | <b>0.000</b> | 5.652         | 0.213        | 0                   |
| CXCL8 (IL8)           | <b>11.730</b> | <b>0.000</b> | 1.008         | 0.963        | <b>4.561</b>  | <b>0.000</b> | 2.115         | 0.694        | 0                   |
| IL10                  | 1.212         | 0.210        | 0.545         | 0.502        | <b>6.032</b>  | <b>0.000</b> | 1.580         | 0.816        | 0                   |
| IL12p40               | 1.241         | 0.914        | 1.103         | 0.795        | <b>8.682</b>  | <b>0.000</b> | 2.250         | 0.402        | <b>1.05083007</b>   |
| IL12p70               | <b>0.000</b>  | <b>0.001</b> | <b>0.082</b>  | <b>0.041</b> | <b>0.000</b>  | <b>0.000</b> | <b>0.035</b>  | <b>0.012</b> | 0                   |
| IL13                  | <b>3.580</b>  | <b>0.027</b> | 1.019         | 0.924        | <b>15.500</b> | <b>0.000</b> | 3.730         | 0.575        | 0                   |
| IL15                  | <b>0.000</b>  | <b>0.042</b> | 0.815         | 0.469        | <b>0.136</b>  | <b>0.002</b> | 1.183         | 0.919        | 0                   |
| IL17A                 | 0.000         | 0.093        | 1.157         | 0.235        | <b>2.026</b>  | <b>0.000</b> | 0.975         | 0.993        | <b>1.124991176</b>  |
| IL17F                 | <b>0.000</b>  | <b>0.001</b> | 2.101         | 0.158        | <b>0.000</b>  | <b>0.000</b> | 0.221         | 0.343        | 0                   |
| IFN $\alpha$ 2        | <b>12.276</b> | <b>0.006</b> | 1.924         | 0.348        | <b>4.769</b>  | <b>0.000</b> | <b>23.358</b> | <b>0.005</b> | 0                   |
| IFN $\beta$           | 2.993         | 0.574        | 1.052         | 0.954        | <b>0.000</b>  | <b>0.000</b> | 0.085         | 0.350        | 0                   |
| IFN $\gamma$          | <b>20.874</b> | <b>0.011</b> | <b>11.525</b> | <b>0.001</b> | <b>50.430</b> | <b>0.000</b> | <b>33.856</b> | <b>0.000</b> | 0                   |
| TNF $\alpha$          | <b>0.000</b>  | <b>0.000</b> | <b>0.092</b>  | <b>0.006</b> | <b>0.000</b>  | <b>0.000</b> | <b>0.011</b>  | <b>0.019</b> | 0                   |
| TNF $\beta$           | <b>0.002</b>  | <b>0.004</b> | 0.992         | 0.963        | <b>0.000</b>  | <b>0.000</b> | 0.474         | 0.371        | 0                   |
| CD40L                 | <b>5.765</b>  | <b>0.005</b> | 3.351         | 0.339        | 0.569         | 0.525        | 2.617         | 0.253        | 0                   |
| sFasL                 | 3.554         | 0.271        | 0.842         | 0.481        | <b>1.813</b>  | <b>0.002</b> | 0.901         | 0.876        | <b>0.439220737</b>  |
| TRAIL (TNFSF10)       | 1.959         | 0.129        | 0.941         | 0.855        | <b>12.404</b> | <b>0.000</b> | 8.527         | 0.761        | 0                   |
| CCL2 (MCP1)           | <b>80.695</b> | <b>0.000</b> | 0.793         | 0.690        | <b>16.755</b> | <b>0.000</b> | 4.601         | 0.222        | 0                   |
| CCL3 (MIP1 $\alpha$ ) | 0.016         | 0.272        | 0.692         | 0.370        | <b>20.611</b> | <b>0.034</b> | 2.124         | 0.500        | 0                   |
| CCL4 (MIP1 $\beta$ )  | 5.500         | 0.163        | 0.295         | 0.309        | <b>0.001</b>  | <b>0.000</b> | 0.153         | 0.118        | 0                   |
| CCL5 (RANTES)         | <b>9.538</b>  | <b>0.000</b> | 0.846         | 0.851        | <b>33.594</b> | <b>0.000</b> | 1.936         | 0.497        | 0                   |
| CCL7 (MCP3)           | <b>4.012</b>  | <b>0.020</b> | 1.285         | 0.705        | 1.677         | 0.439        | <b>6.059</b>  | <b>0.022</b> | 0                   |
| CCL11 (eotaxin)       | 0.002         | 0.000        | 0.849         | 0.776        | 0.005         | 0.000        | 0.125         | 0.008        | -1.179              |
| CXCL1 (GRO $\alpha$ ) | 1.960         | 0.674        | 2.349         | 0.481        | <b>7.914</b>  | <b>0.011</b> | 3.023         | 0.207        | 0                   |
| CXCL5 (ENA78)         | <b>0.129</b>  | <b>0.030</b> | 0.523         | 0.375        | 0.466         | 0.394        | 1.557         | 0.079        | 0                   |
| CXCL9 (MIG)           | <b>17.549</b> | <b>0.001</b> | 0.859         | 0.692        | <b>19.802</b> | <b>0.000</b> | 0.823         | 0.978        | 0                   |
| CXCL10 (IP10)         | 5.784         | 0.084        | 1.091         | 0.867        | <b>0.072</b>  | <b>0.002</b> | <b>0.241</b>  | <b>0.024</b> | 0                   |
| TGF $\alpha$          | <b>49.667</b> | <b>0.016</b> | 1.387         | 0.345        | <b>4.879</b>  | <b>0.007</b> | 1.696         | 0.772        | 0                   |
| TGF $\beta$           | <b>0.022</b>  | <b>0.036</b> | 1.149         | 0.801        | <b>0.077</b>  | <b>0.000</b> | 0.583         | 0.534        | 0                   |
| SCF (SF)              | 1.652         | 0.245        | 1.142         | 0.815        | 0.931         | 0.827        | 0.613         | 0.299        | 0                   |
| CSF1 (MCSF)           | <b>13.256</b> | <b>0.045</b> | 1.437         | 0.473        | <b>3.297</b>  | <b>0.000</b> | 2.403         | 0.787        | <b>1.412636997</b>  |
| CSF2 (GMCSF)          | 16.208        | 0.051        | 0.428         | 0.193        | <b>0.012</b>  | <b>0.000</b> | 0.375         | 0.141        | <b>-1.336685279</b> |
| CSF3 (GCSF)           | 0.285         | 0.564        | 0.932         | 0.933        | <b>0.017</b>  | <b>0.000</b> | 0.389         | 0.174        | 0                   |
| PDGFBB                | <b>0.003</b>  | <b>0.000</b> | 0.750         | 0.626        | <b>0.063</b>  | <b>0.000</b> | 0.693         | 0.612        | <b>-0.540375323</b> |
| $\beta$ NGF           | 0.394         | 0.253        | 1.115         | 0.682        | <b>8.505</b>  | <b>0.000</b> | <b>21.938</b> | <b>0.000</b> | 0                   |
| FGFb                  | 0.027         | 0.120        | 1.238         | 0.755        | <b>0.012</b>  | <b>0.000</b> | 0.207         | 0.176        | 0                   |
| HGF                   | <b>0.019</b>  | <b>0.000</b> | 0.627         | 0.484        | <b>0.134</b>  | <b>0.000</b> | <b>0.218</b>  | <b>0.003</b> | 0                   |
| VEGFA                 | <b>14.938</b> | <b>0.002</b> | 0.224         | 0.178        | 9.058         | 0.083        | 2.113         | 0.655        | 0                   |
| LIF                   | <b>2.214</b>  | <b>0.015</b> | 1.140         | 0.688        | 0.233         | 0.071        | 0.295         | 0.258        | 0                   |
| Resistin              | 2.217         | 0.685        | 2.850         | 0.431        | <b>31.180</b> | <b>0.000</b> | <b>12.428</b> | <b>0.028</b> | 0                   |
| Leptin                | 0.046         | 0.069        | 0.511         | 0.449        | <b>0.012</b>  | <b>0.000</b> | <b>0.068</b>  | <b>0.001</b> | 0                   |
| Serpin E1 (PAI1)      | 0.896         | 0.843        | 0.989         | 0.984        | 0.740         | 0.631        | 0.473         | 0.463        | 0                   |
| sICAM1 (CD54)         | 0.507         | 0.456        | 1.340         | 0.462        | 0.299         | 0.226        | 1.368         | 0.569        | 0                   |
| VCAM1 (CD106)         | 1.637         | 0.361        | 1.694         | 0.403        | 1.906         | 0.434        | <b>6.387</b>  | <b>0.021</b> | 0                   |

**Key:** CV, cross-validation; LASSO, least absolute shrinkage and selection operator; LR, logistic regression; ME/CFS, myalgic encephalomyelitis/chronic fatigue syndrome; OR, odds ratio; PCA, principal component analysis; PLS, partial least square. Yellow highlights indicate cytokines (“features”) that met either LASSO or both the PCA and PLS criteria for inclusion in the final logistic regression model
